# Supplementary material for: Inhibition of the family 20 glycoside hydrolase catalytic modules in the Streptococcus pneumoniae exo-β-d-N-acetylglucosaminidase, StrH
Source: Royal Society of Chemistry journal article supplement (doi:10.1039/c3ob41579a), 2013-01-01
Supplement: c3ob41579a.pdf [file c3ob41579a.pdf]

## **Inhibition of the family 20 glycoside hydrolase catalytic modules in the *Streptococcus pneumoniae* *exo*- $\beta$ -D-N- acetylglucosaminidase, StrH**

**Benjamin Pluinage,<sup>a</sup> Keith A. Stubbs,<sup>b</sup> Mitchell Hattie,<sup>b</sup> David J. Vocadlo<sup>c</sup> and Alisdair B.  
Boraston<sup>\*,a</sup>**

<sup>a</sup> *Biochemistry & Microbiology, University of Victoria, PO Box 3055 STN CSC, Victoria, BC, V8W 3P6, Canada. Fax: +1 250 721 8855; Tel: +1 250 721 7084; E-mail: boraston@uvic.ca*

<sup>b</sup> *School of Chemistry and Biochemistry, University of Western Australia, 35 Stirling Hwy, Crawley, WA, Australia 6009*

<sup>c</sup> *Department of Chemistry, Simon Fraser University, 8888 University Drive, Burnaby, BC, V5A 1S6, Canada*

### Table of content

Table 1: Data processing, refinement statistics, and model statistics for GH20A

Table 2: Data processing, refinement statistics, and model statistics for GH20B

Table 1: Data and refinement statistics for GH20A.

|                                       | NGT                                              | GH20A<br>PUGNAc                             | GH20AGG<br>PUGNAc                                        |
|---------------------------------------|--------------------------------------------------|---------------------------------------------|----------------------------------------------------------|
| <b>Data Collection</b>                |                                                  |                                             |                                                          |
| Beamline                              | MM-002                                           | SSRL BL9-2                                  | SSRL BL9-2                                               |
| Wavelength (Å)                        | 1.54180                                          | 0.97934                                     | 0.97884                                                  |
| Space Group                           | I222                                             | I222                                        | P3 <sub>1</sub> 21                                       |
| Cell Dimensions<br><i>a, b, c</i> (Å) | 78.5, 110.1, 112.2                               | 78.3, 109.6, 112.6                          | 90.1, 90.1, 101.6                                        |
| Resolution (Å)                        | 21.99-1.73 (1.82-1.73)                           | 28.81-1.36 (1.43-1.36)                      | 45.03-2.10 (2.21-2.10)                                   |
| $R_{\text{merge}}$                    | 0.069 (0.399)                                    | 0.071 (0.381)                               | 0.088 (0.386)                                            |
| $I/\sigma I$                          | 14.9 (3.3)                                       | 19.1 (4.0)                                  | 18.8 (6.5)                                               |
| Completeness (%)                      | 97.3 (95.0)                                      | 90.1 (57.7)                                 | 100.0 (100.0)                                            |
| Redundancy                            | 4.9 (4.7)                                        | 9.8 (5.5)                                   | 10.7 (10.1)                                              |
| No. of reflections                    | 244,440                                          | 912,052                                     | 302,144                                                  |
| No. Unique                            | 49,487                                           | 93,267                                      | 28,340                                                   |
| <b>Refinement</b>                     |                                                  |                                             |                                                          |
| Resolution (Å)                        | 21.99-1.73                                       | 28.81-1.36                                  | 45.03-2.10                                               |
| $R_{\text{work}}/R_{\text{free}}$     | 0.16/0.19                                        | 0.12/0.14                                   | 0.17/0.21                                                |
| No. Of atoms                          |                                                  |                                             |                                                          |
| Protein                               | 3627                                             | 3757                                        | 3270                                                     |
| Ligand                                | 23 (PEG), 14 (NGT),<br>4 (MG), 12 (EDO)          | 20 (PEG),<br>25 (PUGNAc),<br>12 (EDO)       | 20 (SO <sub>4</sub> ), 50 (PUGNAc),<br>20 (EDO)          |
| Water                                 | 674                                              | 652                                         | 298                                                      |
| <i>B</i> -factors                     |                                                  |                                             |                                                          |
| Protein                               | 14.8                                             | 13.3                                        | 25.8                                                     |
| Ligand                                | 34.3 (PEG), 12.0 (NGT),<br>22.8 (MG), 45.5 (EDO) | 34.5 (PEG),<br>13.6 (PUGNAc),<br>30.0 (EDO) | 37.1 (SO <sub>4</sub> ),<br>20.2 (PUGNAc),<br>48.0 (EDO) |
| Water<br>r.m.s.d                      | 28.8                                             | 31.7                                        | 34.2                                                     |
| Bond lengths (Å)                      | 0.014                                            | 0.010                                       | 0.009                                                    |
| Bond angles (°)                       | 1.351                                            | 1.360                                       | 1.109                                                    |
| Ramachandran<br>(%)                   |                                                  |                                             |                                                          |
| Preferred                             | 98.6                                             | 98.6                                        | 96.8                                                     |
| Generously<br>allowed                 | 1.4                                              | 1.4                                         | 3.2                                                      |
| Disallowed                            | 0.3                                              | 0                                           | 0                                                        |

Data for highest resolution shell are shown in parentheses

Table 2: Data and refinement statistics for GH20B.

|                                      | NGT                                                                                 | GH20B | PUGNAc                                                            | GH20BWY<br>PUGNAc                                                            |
|--------------------------------------|-------------------------------------------------------------------------------------|-------|-------------------------------------------------------------------|------------------------------------------------------------------------------|
| <b>Data Collection</b>               |                                                                                     |       |                                                                   |                                                                              |
| Beamline                             | SSRL BL9-2                                                                          |       | SSRL BL9-2                                                        | SSRL BL9-2                                                                   |
| Wavelength (Å)                       | 0.97946                                                                             |       | 0.97946                                                           | 0.95369                                                                      |
| Space Group                          | P2 <sub>1</sub>                                                                     |       | P2 <sub>1</sub> 2 <sub>1</sub> 2 <sub>1</sub>                     | P2 <sub>1</sub>                                                              |
| Cell Dimensions                      |                                                                                     |       |                                                                   |                                                                              |
| <i>a, b, c</i> (Å)                   | 67.2, 115.6, 132.0 (β=99.4°)                                                        |       | 66.7, 115.2, 129.9                                                | 67.1, 116.1, 69.6 (β=109.6°)                                                 |
| Resolution (Å)                       | 52.81-2.09 (2.20-2.09)                                                              |       | 30.0-2.40 (2.53-2.40)                                             | 57.1-1.98 (2.09-1.98)                                                        |
| R <sub>merge</sub>                   | 0.104 (0.399)                                                                       |       | 0.117 (0.401)                                                     | 0.133 (0.357)                                                                |
| I/σI                                 | 9.8 (3.5)                                                                           |       | 15.4 (5.4)                                                        | 6.4 (3.2)                                                                    |
| Completeness (%)                     | 100.0 (100.0)                                                                       |       | 99.1 (97.3)                                                       | 97.8 (97.1)                                                                  |
| Redundancy                           | 4.3 (4.3)                                                                           |       | 10.0 (9.3)                                                        | 4.3 (4.1)                                                                    |
| No. of reflections                   | 503,094                                                                             |       | 396,066                                                           | 294,022                                                                      |
| No. Unique                           | 117,532                                                                             |       | 39,589                                                            | 68,111                                                                       |
| <b>Refinement</b>                    |                                                                                     |       |                                                                   |                                                                              |
| Resolution (Å)                       | 52.81-2.09                                                                          |       | 30.0-2.40                                                         | 57.1-1.98                                                                    |
| R <sub>work</sub> /R <sub>free</sub> | 0.19/0.24                                                                           |       | 0.19/0.25                                                         | 0.24/0.30                                                                    |
| No. Of atoms                         |                                                                                     |       |                                                                   |                                                                              |
| Protein                              | 3346 (A), 3399 (B),<br>3374 (C), 3357 (D)                                           |       | 3347 (A), 3329 (B)                                                | 3293 (A), 3319 (B)                                                           |
| Ligand                               | 14 (NGT-E), 14 (NGT-F),<br>14 (NGT-G), 14 (NGT-H),<br>16 (EDO), 8 (MG)              |       | 25 (PUGNAc-C),<br>25 (PUGNAc-D),<br>36 (EDO), 24 (ACT)            | 25 (PUGNAc-C),<br>25 (PUGNAc-D),<br>4 (BR), 24 (EDO), 33 (BCN)               |
| Water                                | 2057                                                                                |       | 546                                                               | 1148                                                                         |
| <i>B</i> -factors                    |                                                                                     |       |                                                                   |                                                                              |
| Protein                              | 17.8 (A), 22.5 (B),<br>18.1 (C), 23.2 (D)                                           |       | 18.9 (A), 19.7 (B)                                                | 16.3 (A), 16.3 (B)                                                           |
| Ligand                               | 10.8 (NGT-E), 19.3 (NGT-F),<br>14.6 (NGT-G), 19.9 (NGT-H),<br>47.4 (EDO), 19.0 (MG) |       | 22.1 (PUGNAc-C),<br>21.2 (PUGNAc-D),<br>33.2 (EDO),<br>41.4 (ACT) | 13.4 (PUGNAc-C),<br>13.3 (PUGNAc-D),<br>52.1 (BR), 26.9 (EDO),<br>36.6 (BCN) |
| Water                                | 31.4                                                                                |       | 24.4                                                              | 27.0                                                                         |
| r.m.s.d                              |                                                                                     |       |                                                                   |                                                                              |
| Bond lengths (Å)                     | 0.010                                                                               |       | 0.010                                                             | 0.007                                                                        |
| Bond angles (°)                      | 1.165                                                                               |       | 1.369                                                             | 1.168                                                                        |
| Ramachandran (%)                     |                                                                                     |       |                                                                   |                                                                              |
| Preferred                            | 96.6                                                                                |       | 95.1                                                              | 97.2                                                                         |
| Generously allowed                   | 3.4                                                                                 |       | 4.7                                                               | 2.8                                                                          |
| Disallowed                           | 0                                                                                   |       | 0.2                                                               | 0                                                                            |

Data for highest resolution shell are shown in parentheses
